# Supplementary material for: Fibroblasts as a Biological Marker for Curative Resection in Pancreatic Ductal Adenocarcinoma
Source: MDPI journal article supplement (doi:10.3390/ijms21113890), 2020-05-29
Supplement: s1 [file s1]

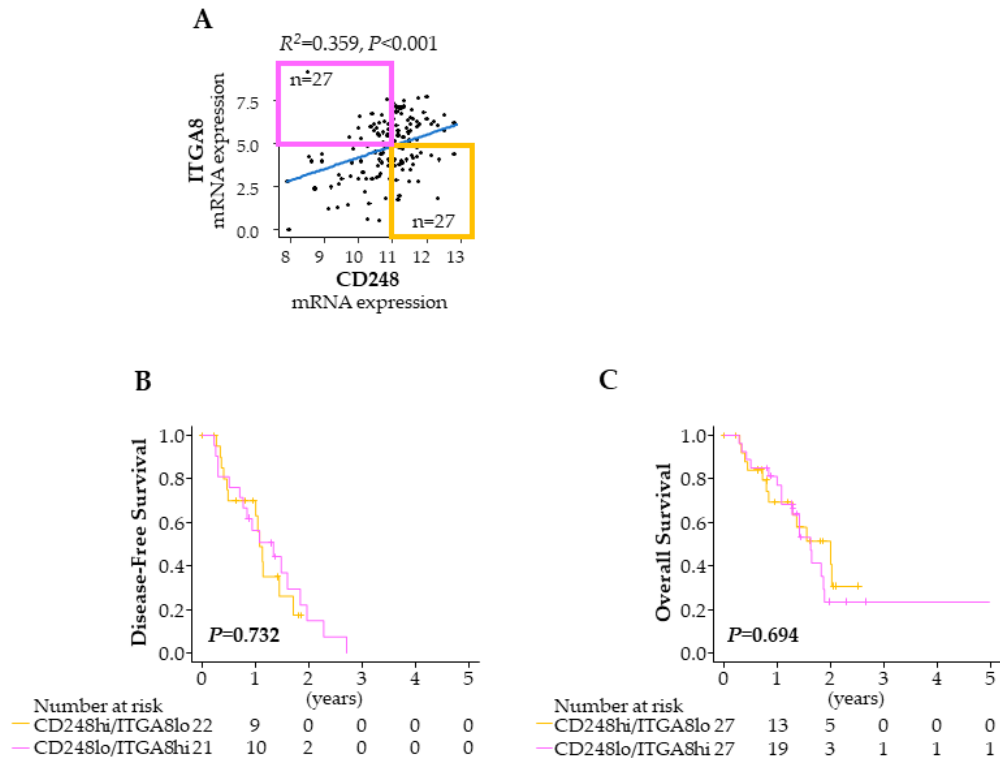

**Figure S1.** Fibroblast subtype classification of PDAC in TCGA. **(A)** Classification of fibroblast by *CD248* and *ITGA8* expression in PDAC. **(B)** Disease-free survival comparison between the patients with the two types of fibroblasts. **(C)** Overall survival comparison between the patients with the two types of fibroblasts.
